# Supplementary material for: Development and validation of a combined cuproptosis and immunogenic cell death prognostic model for diffuse large B-cell lymphoma
Source: publisher site journal article supplement (doi:10.18632/aging.205399), 2024-01-26
Supplement: Supplementary file [file aging-v16i2-205399-supplementary-material-SD1.pdf]

## SUPPLEMENTARY TABLES

**Supplementary Table 1. The 10 cuproptosis-related genes.**

---

FDX1  
LIAS  
LIPT1  
DLD  
DLAT  
PDHA1  
PDHB  
MTF1  
GLS  
CDKN2A

---

**Supplementary Table 2. The 33 immunogenic cell death-related genes.**

---

IL17RA  
IL1R1  
PIK3CA  
CD4  
IFNG  
PRF1  
CXCR3  
CD8A  
CD8B  
P2RX7  
NLRP3  
IL10  
TLR4  
ENTPD1  
ATG5  
IFNB1  
IL6  
EIF2AK3  
IL17A  
LY96  
FOXP3  
HMGB1  
HSP90AA1  
BAX  
PDIA3  
CALR  
CASP8  
MYD88  
IFNGR1  
CASP1

---

IL1B  
TNF  
NT5E

---
