# Supplementary material for: Development and validation of a combined cuproptosis and immunogenic cell death prognostic model for diffuse large B-cell lymphoma
Source: Aging (Albany NY). 2024 Jan 26;16(2):1218–36. doi: 10.18632/aging.205399 (PMC10866411; doi:10.18632/aging.205399)
Supplement: Supplementary Table 3 [file aging-16-205399-s002.xlsx]

## Sheet: Sheet1
Supplementary Table 3. The raw table of risk scores for total dataset.
id	futime	fustat	ANKRD10-IT1	HOXB-AS1	LINC00520	LINC01165	riskScore	risk
GSM275242	1	0	3.34369	2.92067	3.33171	2.42734	0.573063	low
GSM275201	0.01	0	3.04858	2.41075	3.39835	2.16092	2.33157	high
GSM275247	0.03	0	3.33292	2.98413	3.39025	2.52482	0.696626	low
GSM275251	0.03	0	3.37976	2.67129	3.42304	2.33714	0.858097	low
GSM275276	0.03	0	3.20163	2.41183	3.25957	2.52356	1.29818	high
GSM275284	0.04	0	3.33364	2.76299	3.36555	2.76871	0.980486	low
GSM275216	0.05	0	3.46871	2.63715	3.27724	2.61188	0.545984	low
GSM275189	0.06	0	3.4032	2.87352	3.32178	2.48465	0.520126	low
GSM275257	0.08	0	3.38819	2.61918	3.28983	2.39589	0.622439	low
GSM275277	0.09	0	3.26266	2.53219	3.25852	2.43082	0.89877	low
GSM275203	0.1	0	3.1521	2.88986	3.23925	2.45549	0.768114	low
GSM275236	0.11	0	3.33949	2.91131	3.32869	2.51803	0.616704	low
GSM275174	0.12	0	3.42499	2.66357	3.32005	2.42734	0.598634	low
GSM275258	0.15	0	3.34248	2.82497	3.26364	2.90092	0.717927	low
GSM275274	0.15	0	3.17065	2.39273	3.29763	2.28036	1.37464	high
GSM275219	0.16	0	3.32747	2.90852	3.30699	2.39177	0.55069	low
GSM275074	0.19	1	3.40129	2.98878	3.61777	2.84679	1.40876	high
GSM275196	0.21	0	3.40299	2.78983	3.34013	3.02857	0.869238	low
GSM275304	0.21	0	3.22188	2.75969	3.43576	2.91016	1.80029	high
GSM275159	0.23	0	3.19267	2.91676	3.37504	2.53779	1.05786	high
GSM275266	0.23	0	2.99865	2.3083	3.37295	2.44864	3.36835	high
GSM275262	0.24	0	3.22025	2.52218	3.29396	3.0036	1.65753	high
GSM275156	0.25	0	3.26191	2.51665	3.37893	2.64777	1.51728	high
GSM275153	0.28	0	3.25195	2.63238	3.39163	2.91284	1.68909	high
GSM275107	0.3	1	3.41562	2.48285	3.29116	2.85798	0.923815	low
GSM275173	0.31	0	3.4221	3.14225	3.31223	2.98823	0.492406	low
GSM275202	0.33	0	3.22296	2.94448	3.21101	2.77674	0.678455	low
GSM275208	0.34	0	3.4549	2.90497	3.27932	2.20445	0.31921	low
GSM275197	0.35	0	3.02396	2.75307	3.40286	2.86433	2.71434	high
GSM275286	0.36	0	3.4791	2.39273	3.20586	3.03791	0.755225	low
GSM275239	0.37	0	3.42418	2.8054	3.26634	2.68549	0.515094	low
GSM275280	0.38	0	2.98823	2.56791	3.19219	2.89394	2.01198	high
GSM275139	0.4	1	2.93489	2.79338	3.39149	2.83794	3.12618	high
GSM275272	0.4	0	3.4062	2.95075	3.33928	2.26843	0.43067	low
GSM275300	0.41	0	3.19267	2.95364	3.31121	2.9703	1.11702	high
GSM275135	0.42	1	3.06583	2.55802	3.37671	2.92429	2.92433	high
GSM275213	0.42	0	3.38826	2.58628	3.43563	3.05329	1.54644	high
GSM275224	0.42	0	3.17863	2.83147	3.3864	2.50386	1.226	high
GSM275305	0.46	0	3.16076	2.49249	3.37643	2.91418	2.42581	high
GSM275143	0.47	1	3.35973	2.82263	3.35036	2.93206	0.908981	low
GSM275221	0.47	0	3.2933	2.53394	3.25399	2.1306	0.66754	low
GSM275128	0.5	1	3.27314	2.40681	3.32366	3.08423	1.89404	high
GSM275293	0.5	0	3.37608	2.39108	3.15737	3.0115	0.848383	low
GSM275279	0.51	0	3.17297	2.426	3.37295	2.40409	1.7872	high
GSM275051	0.52	1	3.44268	2.94767	3.52268	2.94935	1.06537	high
GSM275303	0.53	0	3.2299	2.69955	3.33985	2.27739	0.931323	low
GSM274930	0.56	1	3.46434	2.77178	3.505	2.99747	1.20611	high
GSM275298	0.58	0	3.26461	2.84227	3.33342	2.23603	0.686698	low
GSM275217	0.6	0	3.09238	2.64916	3.31875	2.48465	1.53919	high
GSM275244	0.6	0	3.39355	3.09837	3.3115	2.86493	0.514145	low
GSM274996	0.61	1	3.45858	2.85947	3.48877	2.90785	0.993629	high
GSM275064	0.61	1	3.44009	3.01534	3.6107	2.97801	1.31515	high
GSM275270	0.61	0	3.2142	2.51058	3.33242	2.30597	1.20443	high
GSM275289	0.61	0	3.36786	3.01087	3.28422	3.07553	0.646197	low
GSM275129	0.62	1	3.19338	1.94823	3.31716	2.38764	2.45943	high
GSM275170	0.62	0	3.48691	2.98586	3.24929	2.8518	0.375096	low
GSM275235	0.62	0	3.2999	2.93282	3.26003	2.2394	0.452905	low
GSM275142	0.65	1	3.00594	1.95661	3.27396	2.51652	3.85933	high
GSM275130	0.67	1	3.29433	2.76065	3.24062	2.58616	0.6665	low
GSM275136	0.67	1	3.33056	2.55925	3.31658	2.99982	1.26016	high
GSM275083	0.68	1	3.12838	2.39081	3.32539	2.18935	1.57824	high
GSM275205	0.69	0	3.48864	2.67728	3.36149	2.78848	0.71452	low
GSM275263	0.69	0	3.31332	2.75093	3.32265	2.53779	0.792318	low
GSM275160	0.71	0	3.19574	3.1066	3.29455	2.43989	0.620918	low
GSM275199	0.71	0	3.30692	2.44824	3.42626	2.90747	1.9916	high
GSM275109	0.72	1	3.26401	3.02583	3.34113	2.98878	0.939201	low
GSM275230	0.72	0	3.38045	2.93036	3.33714	3.02928	0.778573	low
GSM275131	0.74	1	3.07519	2.81034	3.38543	2.57604	1.73523	high
GSM275265	0.74	0	3.22195	2.89327	3.38654	2.5208	1.02811	high
GSM275134	0.8	1	3.13972	2.91944	3.44374	2.33714	1.30616	high
GSM275302	0.8	0	3.10652	2.6311	3.34511	2.1776	1.33466	high
GSM275132	0.81	1	2.94991	2.77926	3.38031	2.18142	1.90779	high
GSM274914	0.82	1	3.42526	2.89453	3.44427	2.76977	0.833602	low
GSM275145	0.82	0	3.19826	2.94542	2.82619	2.48001	0.188491	low
GSM275080	0.84	1	3.4264	2.65386	3.34752	2.54918	0.709872	low
GSM275252	0.86	0	3.31745	2.52231	3.33113	2.34937	0.923224	low
GSM275292	0.86	0	3.23488	2.6049	3.21257	2.55655	0.843963	low
GSM275308	0.87	0	3.09238	2.5404	3.19802	2.48311	1.21578	high
GSM275267	0.89	0	3.36135	2.99213	3.35473	2.31673	0.500836	low
GSM275137	0.93	1	3.17736	2.79161	3.34369	2.89782	1.47349	high
GSM275271	0.94	0	3.29094	2.2916	3.32048	2.9182	1.82952	high
GSM274959	0.97	1	3.43483	3.09483	3.5986	3.09508	1.26874	high
GSM275133	0.98	1	2.78775	2.43896	3.37448	2.74006	6.22411	high
GSM275182	0.99	0	3.28917	2.56389	3.24519	2.5097	0.817183	low
GSM275220	1	0	3.33885	2.97636	3.16591	2.37239	0.319976	low
GSM275288	1.01	0	3.49876	3.08457	3.31991	1.92106	0.215597	low
GSM275190	1.03	0	3.23833	2.59264	3.29101	2.71194	1.18855	high
GSM275021	1.04	1	3.42559	3.18959	3.51929	2.47197	0.607998	low
GSM275222	1.08	0	3.30407	2.35473	3.27873	2.3297	0.980202	low
GSM275207	1.1	0	3.32251	2.46179	3.18571	2.30597	0.614731	low
GSM275296	1.16	0	3.18666	2.68055	3.02521	2.36793	0.443901	low
GSM275307	1.16	0	3.36114	2.97737	3.39122	2.88303	0.828224	low
GSM275138	1.18	1	3.22134	2.88714	3.28806	2.83552	0.952874	low
GSM275233	1.18	0	3.26626	2.498	3.36583	2.82619	1.6591	high
GSM275306	1.21	0	3.32495	2.80869	3.25912	2.10668	0.446199	low
GSM275057	1.22	1	3.43456	2.94579	3.52067	2.88343	1.03817	high
GSM275183	1.22	0	3.47508	3.06221	3.40422	2.41954	0.422389	low
GSM275218	1.24	0	3.32359	2.96384	3.47197	3.06316	1.33485	high
GSM275283	1.26	0	3.20711	2.86869	3.25776	2.99639	1.02812	high
GSM275285	1.27	0	3.29138	2.46676	3.38515	2.81783	1.6938	high
GSM275058	1.29	1	3.33149	2.96551	3.59383	3.01774	1.82079	high
GSM275014	1.3	1	3.45897	3.03712	3.53182	2.91265	0.922328	low
GSM275161	1.31	0	3.356	2.30451	3.4225	2.48001	1.53359	high
GSM275167	1.33	0	3.41014	2.79743	3.32337	2.41576	0.534973	low
GSM275077	1.37	1	2.91447	2.6094	3.35262	2.7649	3.46416	high
GSM275225	1.4	0	3.19393	2.9814	3.33956	2.55164	0.888288	low
GSM275067	1.42	1	3.51791	3.12829	3.60585	2.94205	0.901328	low
GSM275009	1.48	1	3.41954	2.91934	3.46441	2.90651	0.956698	low
GSM275254	1.49	0	3.25527	2.95	3.25988	2.26843	0.510089	low
GSM275269	1.52	0	3.2149	2.38322	3.25505	2.82863	1.56464	high
GSM275110	1.53	1	3.37886	2.76011	3.36359	3.09778	1.07793	high
GSM275115	1.53	1	3.32876	2.62819	3.46871	3.15575	2.0427	high
GSM275290	1.55	0	3.38812	2.77115	3.34625	2.96791	0.904216	low
GSM275001	1.59	1	3.46793	3.12367	3.49313	3.07433	0.808292	low
GSM275141	1.59	1	3.1306	2.138	3.32077	2.39177	2.37028	high
GSM275231	1.59	0	3.2955	3.04238	3.24504	2.88029	0.591312	low
GSM275140	1.6	1	3.35424	2.9972	3.41414	3.07365	1.0023	high
GSM275040	1.63	1	3.45345	3.00351	3.55262	3.06005	1.14211	high
GSM275241	1.64	0	3.32704	2.64708	3.33914	2.41954	0.835973	low
GSM274933	1.65	1	3.44758	3.11378	3.52695	3.04107	0.934321	low
GSM275124	1.65	1	3.30356	2.64847	3.2765	2.29484	0.678698	low
GSM275020	1.66	1	3.4188	3.02662	3.47353	2.88869	0.860062	low
GSM274968	1.67	1	3.47742	3.06454	3.47366	2.49825	0.54271	low
GSM275125	1.69	1	3.23274	2.92086	3.37921	2.2461	0.78851	low
GSM275016	1.7	1	3.35783	2.52293	3.4614	2.93149	1.79819	high
GSM275180	1.7	0	3.33628	2.94692	3.36079	2.72574	0.7543	low
GSM274972	1.71	1	3.47398	2.63355	3.56718	2.97453	1.6347	high
GSM275015	1.84	1	3.45115	3.19527	3.46858	3.0505	0.712096	low
GSM275228	1.86	0	3.50608	3.05172	3.41522	2.92941	0.570527	low
GSM275250	1.88	0	3.33135	2.81281	3.39985	2.95289	1.16623	high
GSM275000	1.91	1	3.41149	3.06876	3.47858	2.9381	0.876481	low
GSM274993	1.92	1	3.45503	3.04885	3.55667	3.15737	1.16542	high
GSM275237	1.92	0	3.36436	2.48671	3.31296	2.35643	0.807041	low
GSM275214	2	0	3.24785	2.75125	3.24275	2.62714	0.789461	low
GSM274934	2.02	1	3.37142	3.10375	3.38764	3.03668	0.762966	low
GSM275072	2.12	1	3.48072	3.13775	3.57495	3.07468	0.981202	low
GSM275086	2.12	1	3.09567	2.53891	3.43109	2.97343	3.3534	high
GSM275033	2.16	1	3.42794	3.14649	3.50691	2.98076	0.85825	low
GSM275108	2.17	1	3.29241	2.55373	3.32409	2.6017	1.10277	high
GSM275087	2.18	1	3.12218	2.54844	3.38225	2.60573	2.0908	high
GSM274997	2.23	1	3.37058	3.17457	3.52832	2.91284	0.987664	low
GSM275281	2.24	0	3.33235	3.12805	3.45286	3.04771	1.00843	high
GSM275166	2.26	0	3.45062	2.86879	3.27322	2.44175	0.387088	low
GSM275165	2.31	0	3.26333	2.1688	3.33299	2.4079	1.67881	high
GSM275047	2.37	1	3.41	3.02255	3.58952	2.87892	1.24279	high
GSM275042	2.39	1	3.41839	3.10039	3.55459	2.96606	1.06034	high
GSM274927	2.43	1	3.46969	3.11578	3.55152	2.91552	0.869572	low
GSM275012	2.43	1	3.44831	3.21708	3.48839	2.87046	0.658582	low
GSM275054	2.44	1	3.48852	2.96625	3.56584	3.02219	1.10076	high
GSM275055	2.46	1	3.47658	3.01641	3.51879	2.93508	0.879661	low
GSM274954	2.48	1	3.44148	2.9594	3.5623	3.04998	1.26891	high
GSM275006	2.49	1	3.47968	3.10593	3.50589	2.7649	0.676003	low
GSM275184	2.49	0	3.30706	2.73855	3.47703	2.63366	1.38112	high
GSM275007	2.5	1	3.42391	2.91514	3.52882	3.01899	1.24098	high
GSM275146	2.54	0	3.36849	3.01961	3.39821	2.64524	0.674224	low
GSM275089	2.58	1	3.33885	2.45101	3.36989	2.31673	1.03969	high
GSM275209	2.59	0	3.36849	2.94925	3.39944	2.57046	0.698374	low
GSM275065	2.66	1	3.45095	2.90333	3.63308	2.57846	1.19159	high
GSM275144	2.68	0	3.37233	2.95949	3.42774	2.8266	0.881284	low
GSM275294	2.69	0	3.37594	3.02645	3.23404	2.92733	0.484488	low
GSM274981	2.71	1	3.46395	3.12259	3.50131	3.04299	0.82093	low
GSM275046	2.72	1	3.39465	2.86701	3.53045	3.0827	1.48778	high
GSM275059	2.74	1	3.39541	2.96643	3.56035	2.84439	1.23529	high
GSM275090	2.75	1	3.28651	2.52795	3.45812	2.34682	1.45369	high
GSM275229	2.76	0	3.35389	2.77136	3.30961	2.04893	0.48226	low
GSM275091	2.77	1	3.0763	2.47781	3.29851	1.79036	1.16215	high
GSM275003	2.78	1	3.3553	3.02476	3.45207	2.76871	0.88528	low
GSM275019	2.79	1	3.39869	2.90506	3.45589	2.78701	0.926206	low
GSM275024	2.8	1	3.39273	3.05041	3.60277	3.06281	1.48196	high
GSM274998	2.81	1	3.48059	2.78952	3.48014	2.92201	0.998877	high
GSM275017	2.93	1	3.34596	3.02299	3.41088	3.0314	0.957872	low
GSM275045	2.94	1	3.53761	2.92951	3.60916	3.10501	1.21037	high
GSM274990	2.95	1	3.36842	3.16229	3.56218	3.10869	1.26979	high
GSM275002	2.95	1	3.44983	3.05615	3.64212	3.01203	1.37314	high
GSM275092	2.98	1	3.30254	2.93282	3.4019	2.74244	0.959646	low
GSM275172	3.03	0	2.92191	2.5645	3.42452	3.14062	5.69014	high
GSM275181	3.03	0	3.36043	2.80859	3.38308	2.89142	0.989619	low
GSM275031	3.07	1	3.49544	3.06936	3.50602	2.97801	0.77911	low
GSM275048	3.12	1	3.49301	2.84167	3.58952	2.976	1.30702	high
GSM275248	3.13	0	3.36646	2.80395	3.32106	2.26213	0.535387	low
GSM275022	3.14	1	3.37072	2.65821	3.49557	3.04893	1.77901	high
GSM275117	3.22	1	3.18903	2.74846	3.42264	3.04684	2.09766	high
GSM275223	3.26	0	3.19849	3.11128	3.40081	2.56925	0.917468	low
GSM275025	3.27	1	3.52124	2.97865	3.53854	3.16092	1.0045	high
GSM275093	3.28	1	3.28437	2.6193	3.37281	2.64247	1.24147	high
GSM275094	3.3	1	3.21529	2.47962	3.3742	2.20821	1.32123	high
GSM274952	3.32	1	3.36457	3.19306	3.50779	2.95233	0.948719	low
GSM274965	3.35	1	3.39266	3.0471	3.55667	3.05224	1.28757	high
GSM275104	3.35	1	3.35959	2.72748	3.42586	3.0063	1.33582	high
GSM275063	3.36	1	3.41954	2.83198	3.55741	2.95903	1.4465	high
GSM275095	3.37	1	3.24694	2.87431	3.40108	2.91265	1.33166	high
GSM274955	3.4	1	3.4489	3.07468	3.51273	2.99946	0.908078	low
GSM274975	3.42	1	3.548	3.02919	3.43856	3.104	0.629989	low
GSM274940	3.43	1	3.40272	2.7966	3.57107	3.04771	1.74177	high
GSM275034	3.46	1	3.34462	3.03993	3.57168	3.1819	1.68385	high
GSM274987	3.5	1	3.42297	3.10677	3.5203	3.05918	0.998462	high
GSM275232	3.58	0	3.29961	2.85768	3.3251	2.38101	0.659586	low
GSM274978	3.65	1	3.37671	3.1177	3.62457	3.17552	1.64666	high
GSM275076	3.67	1	3.29785	2.75425	3.29778	2.12102	0.579033	low
GSM274974	3.7	1	3.46356	3.04841	3.49621	2.543	0.632384	low
GSM275044	3.88	1	3.41859	3.24816	3.68829	3.0709	1.42801	high
GSM275023	3.93	1	3.46068	3.13299	3.65855	3.09946	1.35854	high
GSM275005	3.94	1	3.46218	3.14682	3.46532	2.82579	0.623513	low
GSM275066	3.96	1	3.44996	2.98859	3.62492	3.00755	1.40552	high
GSM275097	3.96	1	3.24891	2.62176	3.36597	2.67559	1.36381	high
GSM275105	3.99	1	3.12449	2.98486	3.335	2.853	1.28502	high
GSM275043	4.01	1	3.48852	3.36205	3.55483	3.08083	0.701285	low
GSM275121	4.01	1	3.28548	3.0492	3.42465	2.51803	0.809782	low
GSM274901	4.09	1	3.39266	3.29374	3.51602	2.42895	0.566805	low
GSM275192	4.13	0	3.15761	2.44784	3.23481	2.54547	1.32086	high
GSM275099	4.2	1	3.38274	2.87253	3.37615	2.53007	0.666921	low
GSM275101	4.36	1	3.22782	2.94757	3.29719	2.90149	0.937674	low
GSM275118	4.36	1	3.0751	2.65753	3.24397	2.47534	1.26944	high
GSM275275	4.36	0	3.21963	2.39177	3.14535	3.05502	1.28161	high
GSM275081	4.42	1	3.40204	2.71436	3.41116	2.80074	1.01017	high
GSM275234	4.47	0	3.30151	2.88118	3.23159	2.94242	0.701662	low
GSM275050	4.55	1	3.39547	2.9115	3.56157	2.91877	1.38768	high
GSM274983	4.72	1	3.46787	2.96569	3.55937	3.05189	1.16478	high
GSM274973	4.74	1	3.28607	2.98003	3.58544	2.99295	1.9406	high
GSM275010	4.8	1	3.47151	2.90236	3.46205	3.07416	0.941902	low
GSM274896	4.83	1	3.45753	3.16928	3.40749	2.76702	0.497813	low
GSM274963	4.94	1	3.44434	3.22612	3.53244	3.15947	0.910465	low
GSM275169	4.99	0	3.41116	3.04098	3.23649	2.94017	0.440353	low
GSM274905	5	1	3.47968	3.07082	3.57604	3.07176	1.06438	high
GSM274985	5.06	1	3.35297	3.02627	3.56035	3.12102	1.55289	high
GSM275029	5.06	1	3.42995	3.13406	3.55336	3.02308	1.02318	high
GSM275062	5.06	1	3.50716	3.01105	3.74749	3.09018	1.78901	high
GSM275041	5.1	1	3.45628	3.07073	3.53692	2.99639	0.959329	low
GSM275030	5.11	1	3.42512	3.10367	3.61459	3.16559	1.41694	high
GSM274977	5.12	1	3.44255	3.05389	3.56108	3.00054	1.09384	high
GSM275122	5.15	1	3.17337	2.75157	3.26168	2.89006	1.21482	high
GSM275037	5.16	1	3.4442	3.14364	3.5758	3.08321	1.08385	high
GSM274982	5.17	1	3.45628	3.16084	3.48104	3.15462	0.81287	low
GSM275035	5.2	1	3.37372	3.06729	3.53144	3.1142	1.27916	high
GSM274976	5.23	1	3.47547	3.2558	3.51475	2.98477	0.683414	low
GSM274988	5.23	1	3.37128	2.92951	3.54733	3.08729	1.55481	high
GSM274964	5.24	1	3.36982	2.97067	3.50881	3.12714	1.36243	high
GSM275004	5.34	1	3.42237	3.0478	3.52293	3.02857	1.05727	high
GSM275126	5.37	1	3.33714	2.53331	3.39479	2.98295	1.59321	high
GSM275162	5.38	0	3.26649	2.88694	3.42035	2.4862	0.993355	high
GSM275075	5.48	1	3.39005	2.94205	3.5967	3.0018	1.59521	high
GSM275036	5.51	1	3.4266	2.94598	3.49198	3.02379	1.06854	high
GSM274939	5.53	1	3.39369	2.98614	3.5297	2.98422	1.21485	high
GSM275154	5.57	0	3.42687	2.49352	3.40708	2.42169	0.936345	low
GSM274999	5.63	1	3.37177	3.01748	3.54461	3.01328	1.32467	high
GSM274926	5.65	1	3.35248	3.08117	3.55397	2.97801	1.30208	high
GSM274984	5.68	1	3.42794	3.08372	3.57797	3.00863	1.16217	high
GSM274912	5.77	1	3.4693	2.8984	3.46858	3.07639	0.972038	low
GSM275032	5.8	1	3.43249	2.97948	3.57386	3.14192	1.3976	high
GSM274925	5.88	1	3.45088	3.0804	3.4791	3.06178	0.845927	low
GSM275198	6.08	0	3.23128	2.93819	3.35769	2.34682	0.778052	low
GSM274979	6.25	1	3.48549	3.01069	3.58773	3.14209	1.21877	high
GSM274915	6.44	1	3.49147	3.07707	3.5277	2.93678	0.810147	low
GSM274950	6.45	1	3.37705	2.96394	3.56304	2.892	1.35413	high
GSM275053	6.5	1	3.34341	2.92809	3.53094	2.83794	1.35418	high
GSM274948	6.65	1	3.39417	2.93348	3.59479	3.07844	1.66708	high
GSM274917	6.78	1	3.44281	3.11203	3.50691	2.61377	0.672337	low
GSM275227	6.8	0	3.38936	2.55582	3.24001	1.61824	0.343069	low
GSM275195	6.87	0	3.31528	2.8532	3.43216	2.27739	0.816821	low
GSM275155	6.94	0	2.93301	2.54139	3.11453	2.28333	1.27165	high
GSM274916	7.11	1	3.34305	2.8477	3.49838	2.85639	1.36616	high
GSM274897	7.21	1	3.36863	3.03219	3.44943	2.64524	0.773989	low
GSM274922	7.24	1	3.45286	2.68325	3.49608	3.04387	1.38357	high
GSM275188	7.49	0	3.31759	3.00171	3.29337	1.69287	0.306382	low
GSM274923	7.72	1	3.38681	3.06316	3.57204	3.01346	1.31	high
GSM274956	8.45	1	3.32625	2.76394	3.49019	3.02875	1.72282	high
GSM274929	8.76	1	3.45759	3.07433	3.54955	2.93055	0.946203	low
GSM274903	8.86	1	3.47541	2.97343	3.47534	2.99259	0.846268	low
GSM275079	8.89	1	3.41468	3.07288	3.22851	2.28629	0.265805	low
GSM274961	9.02	1	3.41711	2.86898	3.51854	2.42546	0.871254	low
GSM275149	9.11	0	3.17025	2.98286	3.35304	2.90862	1.24736	high
GSM274945	9.47	1	3.48607	3.03104	3.58436	2.99603	1.06785	high
GSM274909	9.65	1	3.48446	2.8498	3.4853	2.79971	0.863283	low
GSM274895	9.67	1	3.46552	3.00306	3.48941	2.57725	0.664528	low
GSM274957	9.68	1	3.50112	3.14592	3.49262	2.97508	0.673547	low
GSM274947	9.7	1	3.45523	2.89181	3.61188	2.96956	1.45326	high
GSM274898	10.14	1	3.46218	2.76765	3.4907	2.68482	0.948768	low
GSM274937	10.18	1	3.43449	3.05233	3.57858	3.06005	1.22742	high
GSM275078	10.29	1	3.30049	2.69499	3.37212	2.46074	0.963383	low
GSM274938	10.4	1	3.4591	3.38826	3.52807	2.7314	0.538866	low
GSM274935	10.53	1	3.337	3.04282	3.4769	2.57046	0.859671	low
GSM275176	10.62	0	3.52086	3.02494	3.26138	2.69287	0.305296	low
GSM274928	10.75	1	3.43403	3.05329	3.48594	2.81003	0.788454	low
GSM275240	11.02	0	3.41102	2.96107	3.22497	2.2919	0.30333	low
GSM274910	11.17	1	3.45345	3.01917	3.54979	3.00863	1.07483	high
GSM274911	11.29	1	3.43636	3.23657	3.53916	2.53132	0.617557	low
GSM274920	11.38	1	3.27262	2.90101	3.47158	2.92828	1.50296	high
GSM274918	11.72	1	3.44142	3.03765	3.50906	2.97233	0.939354	low
GSM274902	14.24	1	3.54683	2.76744	3.43429	2.95791	0.766009	low
GSM274906	14.59	1	3.51935	3.06626	3.5272	2.90092	0.742078	low
GSM275249	1	0	3.27113	2.58195	3.33785	2.87362	1.41097	high
GSM275261	0.01	0	3.21839	2.60964	3.31991	1.64985	0.661549	low
GSM275273	0.03	0	3.4221	2.32553	3.32423	2.98914	1.31116	high
GSM275193	0.04	0	3.39245	3.04797	3.34582	2.26843	0.407295	low
GSM275147	0.05	0	3.0283	2.79608	3.31107	2.45549	1.47908	high
GSM275211	0.12	0	3.40715	3.06858	3.28303	2.58376	0.390903	low
GSM275152	0.15	0	3.18658	2.3799	3.40599	2.8799	2.75182	high
GSM275278	0.15	0	3.21031	2.87519	3.31991	2.1776	0.706668	low
GSM275287	0.17	0	3.35537	2.94972	3.27784	3.06557	0.698953	low
GSM275255	0.19	0	3.30254	3.14405	3.32797	2.72814	0.597345	low
GSM275186	0.2	0	3.33935	2.93782	3.43363	3.12433	1.22475	high
GSM275073	0.24	1	3.36835	2.90535	3.58219	2.99856	1.68575	high
GSM275187	0.29	0	3.53531	2.9137	3.50462	2.66607	0.678047	low
GSM275268	0.3	0	3.15194	2.58063	3.32207	2.51248	1.4605	high
GSM275200	0.31	0	3.27195	2.75692	3.26048	2.85718	0.903175	low
GSM275150	0.33	0	3.22766	2.80478	3.42062	2.17345	0.985474	low
GSM275245	0.33	0	3.28288	3.09474	3.36751	1.96606	0.451965	low
GSM275163	0.34	0	3.54813	3.26694	3.51311	3.06126	0.581159	low
GSM275177	0.38	0	3.42311	2.85689	3.34639	2.5828	0.577377	low
GSM275264	0.38	0	3.18801	2.79442	3.22064	3.03703	1.08437	high
GSM275282	0.46	0	3.41292	2.65444	3.28924	2.56828	0.626005	low
GSM275175	0.51	0	3.39087	2.91198	3.3099	2.95103	0.67679	low
GSM275256	0.51	0	3.35699	2.90304	3.25535	2.58616	0.499341	low
GSM275297	0.55	0	3.41447	2.51652	3.33342	2.46388	0.778127	low
GSM275178	0.76	0	3.48974	2.70642	3.31136	2.9568	0.663343	low
GSM275171	0.94	0	3.39046	2.77252	3.40858	2.95884	1.07409	high
GSM275226	0.96	0	3.31368	2.45786	3.34653	2.56365	1.21297	high
GSM275291	0.96	0	3.33256	2.36779	3.31281	3.09085	1.64239	high
GSM275238	1.01	0	3.35586	2.76829	3.21987	2.7264	0.577775	low
GSM275215	1.04	0	3.33793	3.15137	3.33357	2.5208	0.477151	low
GSM275299	1.05	0	3.40728	1.70022	3.22913	2.41386	1.44237	high
GSM275168	1.06	0	3.33671	2.86047	3.40026	2.8125	0.992256	high
GSM275060	1.08	1	3.393	2.88753	3.57604	2.82477	1.40867	high
GSM275194	1.1	0	3.35854	2.74319	3.43763	2.96791	1.32823	high
GSM275185	1.27	0	3.35636	3.12706	3.46375	2.98732	0.939342	low
GSM275111	1.31	1	3.34248	2.89811	3.31165	2.96698	0.795664	low
GSM275206	1.31	0	3.38585	2.63192	3.17377	2.7566	0.554768	low
GSM275148	1.33	0	3.37441	2.53344	3.37823	2.2558	0.845904	low
GSM275260	1.38	0	3.18277	2.66573	3.32639	2.2394	1.02948	high
GSM275112	1.4	1	3.3375	3.06695	3.41846	1.84197	0.43207	low
GSM275116	1.41	1	3.12309	2.70421	3.38612	2.49365	1.63606	high
GSM275259	1.41	0	3.31926	2.81127	3.41954	2.14405	0.747565	low
GSM275204	1.45	0	3.37733	3.1643	3.34951	3.12002	0.660498	low
GSM275113	1.47	1	3.25656	2.55029	3.38957	3.03545	1.97771	high
GSM275243	1.51	0	3.25285	2.34639	3.31223	2.44864	1.3584	high
GSM274995	1.6	1	3.3483	3.1508	3.53605	2.93678	1.1206	high
GSM275013	1.61	1	3.30539	3.04771	3.50297	3.05936	1.39221	high
GSM275070	1.61	1	3.4004	3.06704	3.61294	2.86612	1.28812	high
GSM274994	1.63	1	3.40026	3.13504	3.71754	3.1643	1.98479	high
GSM274962	1.64	1	3.45589	3.12639	3.59729	2.96144	1.05365	high
GSM275253	1.7	0	3.24982	2.98614	3.37712	2.85599	1.0412	high
GSM275049	1.76	1	3.43383	2.79036	3.54114	2.87716	1.31762	high
GSM275069	1.83	1	3.38301	2.67175	3.65237	3.05624	2.71927	high
GSM275068	1.88	1	3.42747	3.07741	3.64616	2.98039	1.41004	high
GSM274992	1.98	1	3.47034	3.02733	3.47599	3.15543	0.900012	low
GSM275084	2.03	1	3.37636	2.87135	3.39808	2.84599	0.894839	low
GSM275164	2.05	0	3.20328	2.6663	3.15866	2.88675	0.907509	low
GSM275085	2.06	1	3.02848	2.62527	3.37156	2.45391	2.15476	high
GSM274991	2.12	1	3.35868	3.12408	3.4769	2.99458	0.978918	low
GSM275212	2.13	0	3.37079	2.96541	3.18253	2.92372	0.450893	low
GSM275246	2.26	0	3.36373	2.99376	3.39506	2.1117	0.48886	low
GSM275158	2.31	0	3.15704	2.63401	3.2225	2.99023	1.38236	high
GSM275056	2.38	1	3.52801	2.8492	3.55225	2.9222	1.01817	high
GSM275071	2.42	1	3.43736	3.06445	3.59323	3.02485	1.22578	high
GSM275088	2.44	1	3.28562	2.81116	3.47755	2.82701	1.53225	high
GSM275210	2.45	0	3.35861	3.04492	3.28792	2.24275	0.370204	low
GSM275106	2.51	1	3.34547	2.3307	3.34866	2.42169	1.18112	high
GSM274971	2.52	1	3.39815	3.01801	3.60348	3.06661	1.5233	high
GSM275008	2.56	1	3.33543	2.7761	3.48285	3.00684	1.59808	high
GSM274958	2.69	1	3.46656	2.80209	3.56499	2.95996	1.35063	high
GSM274951	2.8	1	3.37671	2.92239	3.49339	2.83673	1.11339	high
GSM275114	2.8	1	3.23909	2.5358	3.41251	2.51096	1.59263	high
GSM275179	2.82	0	3.42868	2.75179	3.26349	2.92448	0.629255	low
GSM275018	2.85	1	3.45147	2.68896	3.4572	3.03087	1.21784	high
GSM275011	2.87	1	3.55096	2.79161	3.46467	2.74953	0.702288	low
GSM275052	3.12	1	3.37601	3.08389	3.53667	2.92201	1.11484	high
GSM275039	3.29	1	3.51103	2.94851	3.52143	3.04492	0.940387	low
GSM275061	3.3	1	3.45128	3.01899	3.76299	3.03069	2.07365	high
GSM275096	3.44	1	3.27419	2.95382	3.38571	2.99295	1.13759	high
GSM274931	3.47	1	3.42546	3.08449	3.48954	3.03545	0.913855	low
GSM274980	3.52	1	3.40545	2.95466	3.55827	3.12334	1.45812	high
GSM275120	3.52	1	3.40898	2.91485	3.37476	2.82273	0.716027	low
GSM274989	3.75	1	3.40422	3.09432	3.59956	3.01507	1.31059	high
GSM275119	3.78	1	3.17081	2.2944	3.16189	2.3297	1.06062	high
GSM275301	3.82	0	3.32171	3.03069	3.22712	2.8496	0.518818	low
GSM274936	3.88	1	3.49384	3.05632	3.53618	3.06039	0.918094	low
GSM275295	3.88	0	3.19046	2.39862	3.36723	2.7301	2.14883	high
GSM274904	3.9	1	3.45147	2.84016	3.54399	2.95977	1.26408	high
GSM275151	3.93	0	3.20006	2.84298	3.23481	2.81558	0.893695	low
GSM275123	3.97	1	3.04954	2.64004	3.30728	2.61659	1.84101	high
GSM274941	4.01	1	3.48233	3.03219	3.60431	3.06592	1.19767	high
GSM275098	4.02	1	3.30874	2.8491	3.34894	2.44705	0.729297	low
GSM275027	4.03	1	3.42881	2.92048	3.55065	3.14307	1.41091	high
GSM275026	4.04	1	3.39486	3.23665	3.59896	3.13274	1.23093	high
GSM275082	4.05	1	3.30349	3.01926	3.36359	3.07399	0.963204	low
GSM274944	4.11	1	3.4851	3.02104	3.54213	3.02662	0.974414	low
GSM274946	4.16	1	3.27568	2.97929	3.60027	3.01346	2.11626	high
GSM275127	4.23	1	3.17153	2.45088	2.80839	3.0939	0.511208	low
GSM274942	4.29	1	3.46878	3.15121	3.52607	2.97966	0.809343	low
GSM275100	4.34	1	3.3051	2.54374	3.39218	2.40599	1.16002	high
GSM275102	4.42	1	3.22689	2.86176	3.38847	2.8953	1.35739	high
GSM275103	4.54	1	3.36114	3.02485	3.35389	2.92448	0.720959	low
GSM275038	4.78	1	3.45621	3.25111	3.53468	3.07929	0.817775	low
GSM274986	4.86	1	3.44042	3.15729	3.59503	3.04212	1.11072	high
GSM275028	5.37	1	3.48787	3.00027	3.57858	3.18031	1.22333	high
GSM275191	5.4	0	3.3572	2.71194	3.38253	2.45049	0.831153	low
GSM274907	5.88	1	3.36995	2.80777	3.55692	3.0197	1.7668	high
GSM274913	6.46	1	3.47554	3.18959	3.48065	3.06212	0.701345	low
GSM275157	6.64	0	3.37796	2.89908	3.29968	2.87125	0.654199	low
GSM274969	6.72	1	3.50468	3.09238	3.44095	2.60786	0.476483	low
GSM274900	7.22	1	3.29381	2.8802	3.51576	2.543	1.28443	high
GSM274966	7.42	1	3.44109	2.697	3.51286	2.60383	1.10294	high
GSM274953	7.62	1	3.43376	2.72629	3.65924	3.11437	2.36368	high
GSM274949	7.81	1	3.44168	3.07073	3.65489	3.07724	1.49722	high
GSM274921	8.15	1	3.39362	2.98377	3.48723	3.0018	1.08594	high
GSM274924	8.36	1	3.31201	3.17281	3.4593	3.08882	1.05962	high
GSM274960	9.16	1	3.37114	2.69332	3.48182	2.99639	1.58156	high
GSM274967	9.99	1	3.31325	2.9594	3.47145	2.918	1.25067	high
GSM274908	10.53	1	3.39403	2.8672	3.5203	2.70066	1.12124	high
GSM274919	12.12	1	3.3906	3.17273	3.45194	2.84036	0.711579	low
GSM274970	12.34	1	3.30939	2.65237	3.54015	2.89898	2.18354	high
GSM274899	15.41	1	3.41542	3.01819	3.44917	2.90708	0.82494	low
GSM274943	16.79	1	3.4549	3.08721	3.54411	2.99095	0.961771	low
GSM274932	21.78	1	3.55594	3.01623	3.34809	3.07296	0.468085	low
