# Supplementary material for: Development and validation of a combined cuproptosis and immunogenic cell death prognostic model for diffuse large B-cell lymphoma
Source: Aging (Albany NY). 2024 Jan 26;16(2):1218–36. doi: 10.18632/aging.205399 (PMC10866411; doi:10.18632/aging.205399)
Supplement: Supplementary Table 5 [file aging-16-205399-s004.xlsx]

## Sheet: Sheet1
Supplementary Table 5. The raw table of risk scores validation set.
id	futime	fustat	ANKRD10-IT1	HOXB-AS1	LINC00520	LINC01165	riskScore	risk
GSM275249	1	0	3.27113	2.58195	3.33785	2.87362	1.41097	high
GSM275261	0.01	0	3.21839	2.60964	3.31991	1.64985	0.661549	low
GSM275273	0.03	0	3.4221	2.32553	3.32423	2.98914	1.31116	high
GSM275193	0.04	0	3.39245	3.04797	3.34582	2.26843	0.407295	low
GSM275147	0.05	0	3.0283	2.79608	3.31107	2.45549	1.47908	high
GSM275211	0.12	0	3.40715	3.06858	3.28303	2.58376	0.390903	low
GSM275152	0.15	0	3.18658	2.3799	3.40599	2.8799	2.75182	high
GSM275278	0.15	0	3.21031	2.87519	3.31991	2.1776	0.706668	low
GSM275287	0.17	0	3.35537	2.94972	3.27784	3.06557	0.698953	low
GSM275255	0.19	0	3.30254	3.14405	3.32797	2.72814	0.597345	low
GSM275186	0.2	0	3.33935	2.93782	3.43363	3.12433	1.22475	high
GSM275073	0.24	1	3.36835	2.90535	3.58219	2.99856	1.68575	high
GSM275187	0.29	0	3.53531	2.9137	3.50462	2.66607	0.678047	low
GSM275268	0.3	0	3.15194	2.58063	3.32207	2.51248	1.4605	high
GSM275200	0.31	0	3.27195	2.75692	3.26048	2.85718	0.903175	low
GSM275150	0.33	0	3.22766	2.80478	3.42062	2.17345	0.985474	low
GSM275245	0.33	0	3.28288	3.09474	3.36751	1.96606	0.451965	low
GSM275163	0.34	0	3.54813	3.26694	3.51311	3.06126	0.581159	low
GSM275177	0.38	0	3.42311	2.85689	3.34639	2.5828	0.577377	low
GSM275264	0.38	0	3.18801	2.79442	3.22064	3.03703	1.08437	high
GSM275282	0.46	0	3.41292	2.65444	3.28924	2.56828	0.626005	low
GSM275175	0.51	0	3.39087	2.91198	3.3099	2.95103	0.67679	low
GSM275256	0.51	0	3.35699	2.90304	3.25535	2.58616	0.499341	low
GSM275297	0.55	0	3.41447	2.51652	3.33342	2.46388	0.778127	low
GSM275178	0.76	0	3.48974	2.70642	3.31136	2.9568	0.663343	low
GSM275171	0.94	0	3.39046	2.77252	3.40858	2.95884	1.07409	high
GSM275226	0.96	0	3.31368	2.45786	3.34653	2.56365	1.21297	high
GSM275291	0.96	0	3.33256	2.36779	3.31281	3.09085	1.64239	high
GSM275238	1.01	0	3.35586	2.76829	3.21987	2.7264	0.577775	low
GSM275215	1.04	0	3.33793	3.15137	3.33357	2.5208	0.477151	low
GSM275299	1.05	0	3.40728	1.70022	3.22913	2.41386	1.44237	high
GSM275168	1.06	0	3.33671	2.86047	3.40026	2.8125	0.992256	high
GSM275060	1.08	1	3.393	2.88753	3.57604	2.82477	1.40867	high
GSM275194	1.1	0	3.35854	2.74319	3.43763	2.96791	1.32823	high
GSM275185	1.27	0	3.35636	3.12706	3.46375	2.98732	0.939342	low
GSM275111	1.31	1	3.34248	2.89811	3.31165	2.96698	0.795664	low
GSM275206	1.31	0	3.38585	2.63192	3.17377	2.7566	0.554768	low
GSM275148	1.33	0	3.37441	2.53344	3.37823	2.2558	0.845904	low
GSM275260	1.38	0	3.18277	2.66573	3.32639	2.2394	1.02948	high
GSM275112	1.4	1	3.3375	3.06695	3.41846	1.84197	0.43207	low
GSM275116	1.41	1	3.12309	2.70421	3.38612	2.49365	1.63606	high
GSM275259	1.41	0	3.31926	2.81127	3.41954	2.14405	0.747565	low
GSM275204	1.45	0	3.37733	3.1643	3.34951	3.12002	0.660498	low
GSM275113	1.47	1	3.25656	2.55029	3.38957	3.03545	1.97771	high
GSM275243	1.51	0	3.25285	2.34639	3.31223	2.44864	1.3584	high
GSM274995	1.6	1	3.3483	3.1508	3.53605	2.93678	1.1206	high
GSM275013	1.61	1	3.30539	3.04771	3.50297	3.05936	1.39221	high
GSM275070	1.61	1	3.4004	3.06704	3.61294	2.86612	1.28812	high
GSM274994	1.63	1	3.40026	3.13504	3.71754	3.1643	1.98479	high
GSM274962	1.64	1	3.45589	3.12639	3.59729	2.96144	1.05365	high
GSM275253	1.7	0	3.24982	2.98614	3.37712	2.85599	1.0412	high
GSM275049	1.76	1	3.43383	2.79036	3.54114	2.87716	1.31762	high
GSM275069	1.83	1	3.38301	2.67175	3.65237	3.05624	2.71927	high
GSM275068	1.88	1	3.42747	3.07741	3.64616	2.98039	1.41004	high
GSM274992	1.98	1	3.47034	3.02733	3.47599	3.15543	0.900012	low
GSM275084	2.03	1	3.37636	2.87135	3.39808	2.84599	0.894839	low
GSM275164	2.05	0	3.20328	2.6663	3.15866	2.88675	0.907509	low
GSM275085	2.06	1	3.02848	2.62527	3.37156	2.45391	2.15476	high
GSM274991	2.12	1	3.35868	3.12408	3.4769	2.99458	0.978918	low
GSM275212	2.13	0	3.37079	2.96541	3.18253	2.92372	0.450893	low
GSM275246	2.26	0	3.36373	2.99376	3.39506	2.1117	0.48886	low
GSM275158	2.31	0	3.15704	2.63401	3.2225	2.99023	1.38236	high
GSM275056	2.38	1	3.52801	2.8492	3.55225	2.9222	1.01817	high
GSM275071	2.42	1	3.43736	3.06445	3.59323	3.02485	1.22578	high
GSM275088	2.44	1	3.28562	2.81116	3.47755	2.82701	1.53225	high
GSM275210	2.45	0	3.35861	3.04492	3.28792	2.24275	0.370204	low
GSM275106	2.51	1	3.34547	2.3307	3.34866	2.42169	1.18112	high
GSM274971	2.52	1	3.39815	3.01801	3.60348	3.06661	1.5233	high
GSM275008	2.56	1	3.33543	2.7761	3.48285	3.00684	1.59808	high
GSM274958	2.69	1	3.46656	2.80209	3.56499	2.95996	1.35063	high
GSM274951	2.8	1	3.37671	2.92239	3.49339	2.83673	1.11339	high
GSM275114	2.8	1	3.23909	2.5358	3.41251	2.51096	1.59263	high
GSM275179	2.82	0	3.42868	2.75179	3.26349	2.92448	0.629255	low
GSM275018	2.85	1	3.45147	2.68896	3.4572	3.03087	1.21784	high
GSM275011	2.87	1	3.55096	2.79161	3.46467	2.74953	0.702288	low
GSM275052	3.12	1	3.37601	3.08389	3.53667	2.92201	1.11484	high
GSM275039	3.29	1	3.51103	2.94851	3.52143	3.04492	0.940387	low
GSM275061	3.3	1	3.45128	3.01899	3.76299	3.03069	2.07365	high
GSM275096	3.44	1	3.27419	2.95382	3.38571	2.99295	1.13759	high
GSM274931	3.47	1	3.42546	3.08449	3.48954	3.03545	0.913855	low
GSM274980	3.52	1	3.40545	2.95466	3.55827	3.12334	1.45812	high
GSM275120	3.52	1	3.40898	2.91485	3.37476	2.82273	0.716027	low
GSM274989	3.75	1	3.40422	3.09432	3.59956	3.01507	1.31059	high
GSM275119	3.78	1	3.17081	2.2944	3.16189	2.3297	1.06062	high
GSM275301	3.82	0	3.32171	3.03069	3.22712	2.8496	0.518818	low
GSM274936	3.88	1	3.49384	3.05632	3.53618	3.06039	0.918094	low
GSM275295	3.88	0	3.19046	2.39862	3.36723	2.7301	2.14883	high
GSM274904	3.9	1	3.45147	2.84016	3.54399	2.95977	1.26408	high
GSM275151	3.93	0	3.20006	2.84298	3.23481	2.81558	0.893695	low
GSM275123	3.97	1	3.04954	2.64004	3.30728	2.61659	1.84101	high
GSM274941	4.01	1	3.48233	3.03219	3.60431	3.06592	1.19767	high
GSM275098	4.02	1	3.30874	2.8491	3.34894	2.44705	0.729297	low
GSM275027	4.03	1	3.42881	2.92048	3.55065	3.14307	1.41091	high
GSM275026	4.04	1	3.39486	3.23665	3.59896	3.13274	1.23093	high
GSM275082	4.05	1	3.30349	3.01926	3.36359	3.07399	0.963204	low
GSM274944	4.11	1	3.4851	3.02104	3.54213	3.02662	0.974414	low
GSM274946	4.16	1	3.27568	2.97929	3.60027	3.01346	2.11626	high
GSM275127	4.23	1	3.17153	2.45088	2.80839	3.0939	0.511208	low
GSM274942	4.29	1	3.46878	3.15121	3.52607	2.97966	0.809343	low
GSM275100	4.34	1	3.3051	2.54374	3.39218	2.40599	1.16002	high
GSM275102	4.42	1	3.22689	2.86176	3.38847	2.8953	1.35739	high
GSM275103	4.54	1	3.36114	3.02485	3.35389	2.92448	0.720959	low
GSM275038	4.78	1	3.45621	3.25111	3.53468	3.07929	0.817775	low
GSM274986	4.86	1	3.44042	3.15729	3.59503	3.04212	1.11072	high
GSM275028	5.37	1	3.48787	3.00027	3.57858	3.18031	1.22333	high
GSM275191	5.4	0	3.3572	2.71194	3.38253	2.45049	0.831153	low
GSM274907	5.88	1	3.36995	2.80777	3.55692	3.0197	1.7668	high
GSM274913	6.46	1	3.47554	3.18959	3.48065	3.06212	0.701345	low
GSM275157	6.64	0	3.37796	2.89908	3.29968	2.87125	0.654199	low
GSM274969	6.72	1	3.50468	3.09238	3.44095	2.60786	0.476483	low
GSM274900	7.22	1	3.29381	2.8802	3.51576	2.543	1.28443	high
GSM274966	7.42	1	3.44109	2.697	3.51286	2.60383	1.10294	high
GSM274953	7.62	1	3.43376	2.72629	3.65924	3.11437	2.36368	high
GSM274949	7.81	1	3.44168	3.07073	3.65489	3.07724	1.49722	high
GSM274921	8.15	1	3.39362	2.98377	3.48723	3.0018	1.08594	high
GSM274924	8.36	1	3.31201	3.17281	3.4593	3.08882	1.05962	high
GSM274960	9.16	1	3.37114	2.69332	3.48182	2.99639	1.58156	high
GSM274967	9.99	1	3.31325	2.9594	3.47145	2.918	1.25067	high
GSM274908	10.53	1	3.39403	2.8672	3.5203	2.70066	1.12124	high
GSM274919	12.12	1	3.3906	3.17273	3.45194	2.84036	0.711579	low
GSM274970	12.34	1	3.30939	2.65237	3.54015	2.89898	2.18354	high
GSM274899	15.41	1	3.41542	3.01819	3.44917	2.90708	0.82494	low
GSM274943	16.79	1	3.4549	3.08721	3.54411	2.99095	0.961771	low
GSM274932	21.78	1	3.55594	3.01623	3.34809	3.07296	0.468085	low
