# Supplementary material for: Development and validation of a combined cuproptosis and immunogenic cell death prognostic model for diffuse large B-cell lymphoma
Source: Aging (Albany NY). 2024 Jan 26;16(2):1218–36. doi: 10.18632/aging.205399 (PMC10866411; doi:10.18632/aging.205399)
Supplement: Supplementary Table 6 [file aging-16-205399-s005.xlsx]

## Sheet: Sheet1
Supplementary Table 6. The primer sequences of four lncRNAs.
Genes				Forward Primer (5′-3′)	Reverse Primer (5′-3′)
HTRA1				TCCCAACAGTTTGCGCCATAA	CCGGCACCTCTCGTTTAGAAA
RBBP7				GAGGAGCGTGTCATCAATGAA	GCATGGGTCATAACCAGGTCATA
NFE2L2				TTCCCGGTCACATCGAGAG	TCCTGTTGCATACCGTCTAAATC
SCAF11				TGAAAGCAAAGTGTACCAACCT	GGCTCTCTATAAGCTCCTCTGT
ABL1				TGAAAAGCTCCGGGTCTTAGG	TTGACTGGCGTGATGTAGTTG
PAK2				CACCCGCAGTAGTGACAGAG	GGGTCAATTACAGACCGTGTG
CPTP				TCTGCGCCGACTCCTACAA	CTCGCCTAGCATCTGCACG
ADORA3				GGCCAATGTTACCTACATCACC	CCAGGGCTAGAGAGACAATGAA

## Sheet: Sheet2
Genes	Forward Primer (5′-3′)	Reverse Primer (5′-3′)
ANKRD10	TAGAAAGGGACAGTAAGTGGGT	ATGATTTAGCAAGGGAGAAAGA
HOXB-AS1	GCTCTCTCCCCAATGCC	GCCTCTTTCGACTCCCTCT
LINC00520	CCCTCCCTAGCCCGTAT	CCAGCCAAGTAGTTTCCCT
LINC01165	CCAGCAATGAACCCTCAAC	GCTCACTCTTCTCCCTCCTG
GAPDH	GGAGTCCACTGGCGTCTTCA	GTCATGAGTCCTTCCACGATACC
